# Supplementary material
Source: PubMed Central journal article supplement (PMC3810087)
Supplement: ASN.2013020148_ASN2013020148SupplementaryData.pdf [file ASN.2013020148_ASN2013020148SupplementaryData.pdf]

## SUPPLEMENTAL INFORMATION

**Age information for human cohorts:** The year that the sample was received and the year of birth was provided for 4894 (58%) of the 8371 cases. For these 4894, the average age at sample enrollment was 40.26 years old (range: 5-87). Age at onset was provided for 6723 (80.3%) of the 8371 cases. Their mean age of onset is 31.16 (range: 2-87). Year of birth and the year that the sample was enrolled into the study was provided for 3512 (46.9%) of the 7491 controls. Their average age at sample enrollment was 41.65 years old (range: 8 - 86).

### Geographic information for human cohorts:

| Race             | Country of origin     | N    | %       |
|------------------|-----------------------|------|---------|
| European         | USA                   | 4429 | 59.63%  |
|                  | Spain                 | 881  | 11.86%  |
|                  | England               | 773  | 10.41%  |
|                  | Italy                 | 614  | 8.27%   |
|                  | Portugal              | 349  | 4.70%   |
|                  | Belgium               | 89   | 1.20%   |
|                  | Hungary               | 72   | 0.97%   |
|                  | Holland               | 65   | 0.88%   |
|                  | Denmark               | 65   | 0.88%   |
|                  | Argentina             | 44   | 0.59%   |
|                  | Canada                | 24   | 0.32%   |
|                  | Sweden                | 22   | 0.30%   |
| African-American | USA                   | 3338 | 100.00% |
| Asian            | S Korea               | 1380 | 54.65%  |
|                  | Korea (not specified) | 498  | 19.72%  |
|                  | China                 | 319  | 12.63%  |

|          |                                    |     |        |
|----------|------------------------------------|-----|--------|
|          | USA                                | 169 | 6.69%  |
|          | Taiwan                             | 102 | 4.04%  |
|          | Japan                              | 29  | 1.15%  |
|          | Singapore                          | 28  | 1.11%  |
| Hispanic | Unknown (USA addresses)            | 938 | 40.80% |
|          | Argentina                          | 404 | 17.57% |
|          | Puerto Rico                        | 284 | 12.35% |
|          | Mexico                             | 258 | 11.22% |
|          | Colombia                           | 230 | 10.00% |
|          | Peru                               | 168 | 7.31%  |
|          | Smaller Central American countries | 15  | 0.65%  |
|          | USA                                | 3   | 0.13%  |
|          | Bolivia                            | 2   | 0.09%  |
